# Supplementary material for: Kinetic modelling of phospholipid synthesis in Plasmodium knowlesi unravels crucial steps and relative importance of multiple pathways
Source: Springer Nature journal article supplement (doi:10.1186/1752-0509-7-123), 2013-01-01

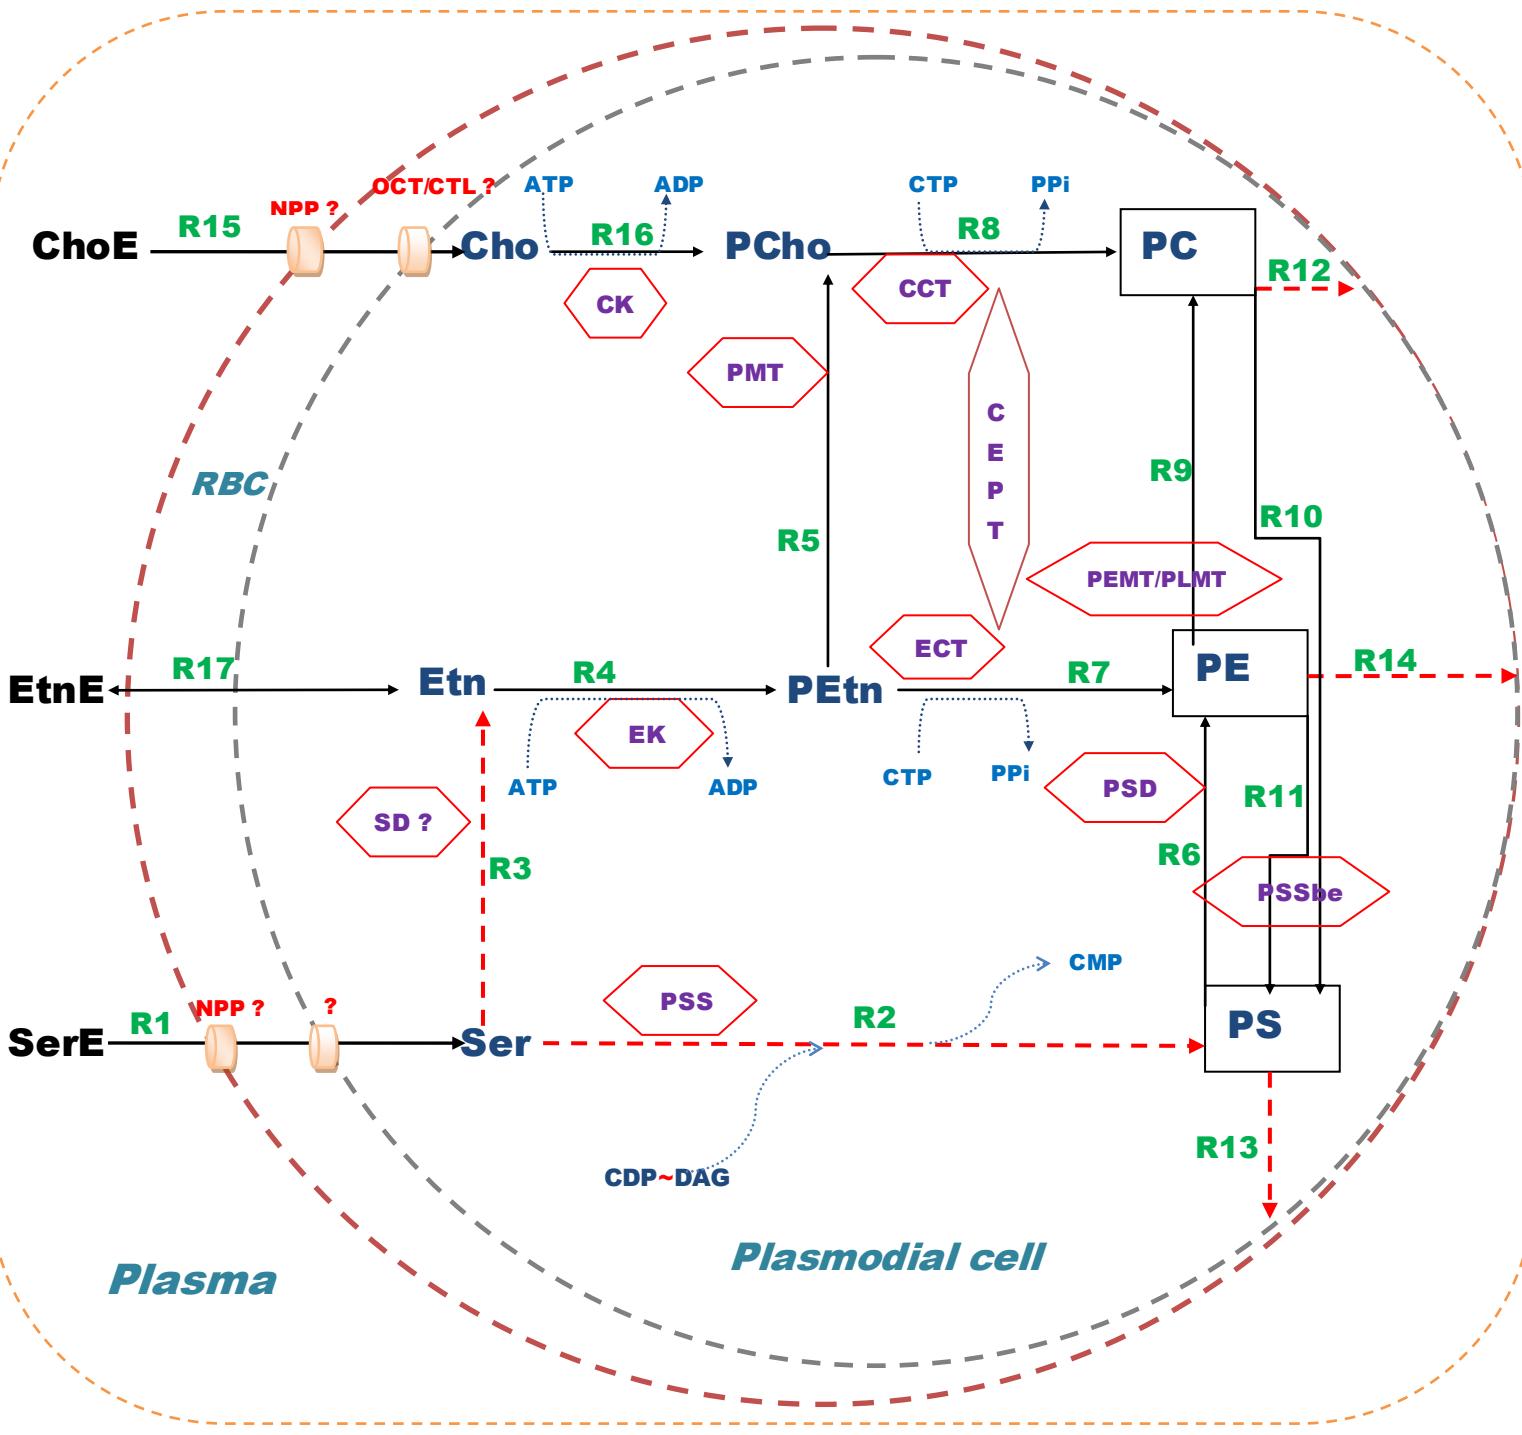

Supplement: 12918_2013_1204_MOESM3_ESM.pdf [file 12918_2013_1204_MOESM3_ESM.pdf]
